# Supplementary material for: Prophylactic Intervention for Relapse after Allogeneic Peripheral Blood Stem Cell Transplantation Improve the Survival of adult patients with Myelodysplastic Syndrome based on IPSS-M stratification
Source: Research Square preprint supplement (doi:10.21203/rs.3.rs-4301852/v1), 2024-04-29
Supplement: Supplementary file 1 [file 0da49e17a48afbe3a0458231.docx]

**Table 3. Multivariable analysis for OS and RFS**

| Factor | | 95.0% CI | | | |
| --- | --- | --- | --- | --- | --- |
| Hazard Ratio | Lower | Upper | P value |
| **OS** | |  | | | |
| Age (y) | ≥55 | 2.577 | 1.249 | 5.317 | 0.010 |
| <55 |  |  |  |  |
| IPSS-M | Very high risk | 3.404 | 1.382 | 8.381 | 0.008 |
| Others |  |  |  |  |
| KPS (score) | <90 | 2.751 | 1.301 | 5.815 | 0.008 |
| ≥90 |  |  |  |  |
| Acute GvHD (grades 3-4) | Yes | 3.661 | 1.374 | 9.750 | 0.009 |
| No |  |  |  |  |
| **RFS** | |  |  |  |  |
| Age (y) | ≥55 | 2.415 | 1.187 | 4.910 | 0.015 |
| <55 |  |  |  |  |
| IPSS-M | Very high risk | 3.891 | 1.592 | 9.507 | 0.003 |
| Others |  |  |  |  |
| KPS (score) | <90 | 2.387 | 1.146 | 4.972 | 0.020 |
| ≥90 |  |  |  |  |
| Acute GvHD (grades 3-4) | Yes | 3.706 | 1.381 | 9.947 | 0.009 |
| No |  |  |  |  |

IPSS-M, Molecular International Prognostic Scoring System; KPS, Karnofsky Performance Status; GvHD, Graft-versus-Host Disease; CI, confidence interval; OS, overall survival; RFS, recurrence free survival.
