# Supplementary material for: Prophylactic Intervention for Relapse after Allogeneic Peripheral Blood Stem Cell Transplantation Improve the Survival of adult patients with Myelodysplastic Syndrome based on IPSS-M stratification
Source: Research Square preprint supplement (doi:10.21203/rs.3.rs-4301852/v1), 2024-04-29
Supplement: Supplementary file 2 [file b8a44019d4c2ec5ef8ef3168.docx]

**Table1. Patient characteristics.**

| **Characteristic** | **Total cohort**  **(n=129)** |
| --- | --- |
| **Age in years, median (IQR)** | 45(32-56) |
| **Sex, n (%)** |  |
| Male | 72(55.8) |
| Female | 57(44.2) |
| **WHO category, n (%)** |  |
| EB1/EB2 | 100 (77.5) |
| MDS-MLD/SLD/RS-MLD | 29(22.5) |
| **IPSS-R, n (%)** |  |
| Low | 5(3.9) |
| Intermediate | 25(19.4) |
| High | 47(36.4) |
| Very high | 52(40.3) |
| **IPSS-M categories, n (%)** |  |
| Low | 2(1.6) |
| Moderate low | 4(3.1) |
| Moderate high | 21(16.3) |
| High | 32(24.8) |
| Very high  **TP53 mutation, n (%)** | 70(54.3)  16(12.4) |
| **Treatment before HSCT, n (%)** |  |
| HMA | 39(30.2) |
| Chemothraphy | 17(13.2) |
| Others* | 73(56.6) |
| **Conditioning regimens, n (%)** |  |
| MAC | 88(68.2) |
| RIC | 41(31.8) |
| **Donor, n (%)** |  |
| Haploidentical | 89(69.0) |
| Matched** | 40(31.0) |
| **Time to HSCT in days, median (IQR)** | 138（74-302） |
| **Combined umbilical blood, n (%)** |  |
| Yes | 21(16.3) |
| No | 108(83.7) |
| Nuclear cells，×107/kg，median（IQR） | 2.8（2.2-3.2） |
| CD34+ cells，×105/kg，median（IQR) | 1.1（0.6-1.4） |
| **ABO blood type，n (%)** |  |
| **Matched**  **Unmatched**  Major | 64(49.6)  21(16.3) |
| Minor | 37(28.7) |
| Bidirectional | 7(5.4) |
| **Donor to recipient gender，n (%)** |  |
| Female to Male | 26（20.2） |
| Others | 103（79.8） |
| **MNCs, ×108/kg, median（IQR）** | 15.3 (11.8-18.4) |
| **CD34+ cells, ×106/kg, median（IQR）** | 10.7(6.7-14.6) |
| **CD3+ cells , ×108/kg, median（IQR）** | 3.5（2.7-4.8） |

*Others: include low-dose cytarabine, cyclosporine, danazol, eltrombopag, erythropoietin-stimulating agents, thalidomide, steroid, blood transfusion.

**Matched: matched sibling donor (MSD), matched unrelated-donor (URD)

WHO, World Health Organization; MSD, myelodysplastic syndromes; MDS-EB1, MDS with excess of blasts type 1; MDS-EB, MDS with excess of blasts type 2; MDS-MLD, MDS with multilineage dysplasia; MDS-RS-MLD, MDS with ring sideroblasts and multilineage dysplasia; MDS-SLD, MDS with single-lineage dysplasia; IPSS-R, Revised International Prognostic Scoring System; IPSS-M, Molecular International Prognostic Scoring System; MAC, myeloablative conditioning; RIC, reduced-intensity conditioning; HSCT, hematopoietic stem cell transplantation; HMA, hypomethylating agent; MNCs, mononuclear cells.
