# Supplementary material for: Prophylactic Intervention for Relapse after Allogeneic Peripheral Blood Stem Cell Transplantation Improve the Survival of adult patients with Myelodysplastic Syndrome based on IPSS-M stratification
Source: Research Square preprint supplement (doi:10.21203/rs.3.rs-4301852/v1), 2024-04-29
Supplement: Supplementary file 3 [file c71d9f183ac5b3543dc6cc83.docx]

**Table 2. Transplantation outcomes.**

| Outcomes | Time after HSCT | N=129 |
| --- | --- | --- |
| Graft failure, n (%) |  | 2（1.6） |
| Days to ANC engraftment, median (IQR) |  | 12（12-15） |
| Days to PLT engraftment, median (IQR) |  | 14（12-17） |
| Acute GvHD, all grades, CI（%） | 6 months | 22.1 |
| Acute GvHD, grades 2-4, CI（%） | 6 months | 10.3 |
| Acute GvHD, grades 3-4, CI（%） | 6 months | 6.4 |
| Chronic GvHD, all grades, CI（%） | 2 years | 15.6 |
| Chronic GvHD, moderate to severe,CI（%） | 2 years | 10.1 |
| OS（%） | 1 years | 81.4 |
| 2 years | 76.9 |
| RFS（%） | 1 years | 79.8 |
| 2 years | 75.4 |
| GRFS（%） | 1 years | 74.4 |
| 2 years | 68.1 |
| NRM（%） | 1 years | 13.9 |
| 2 years | 17.7 |
| CIR（%） | 1 years | 8.6 |
| 2 years | 9.9 |

ANC, absolute neutrophil; PLT, platelet; GvHD, Graft-versus-Host Disease; CI, cumulative incidence; OS, overall survival; RFS, recurrence free survival; GRFS, Graft-versus-Host Disease-Free Recurrence-Free Survival; NRM, non-relapse mortality; CIR, cumulative incidence of relapse.
